# Supplementary material for: Modes of Action of Microbially-Produced Phytotoxins
Source: MDPI journal article supplement (doi:10.3390/toxins3081038), 2011-08-22
Supplement: s1 [file s1]

Correction

**Correction: Duke, S.O., *et al.*, Modes of Action of Microbially-Produced Phytotoxins. *Toxins* 2011, 3, 1038–1064**

Stephen O. Duke \* and Franck E. Dayan

United States Department of Agriculture, Agricultural Research Service, Natural Products Utilization Research Unit, P. O. Box 8048, MS 38677, USA; E-Mail: Franck.Dayan@ars.usda.gov

\* Author to whom correspondence should be addressed; E-Mail: Stephen.Duke@ars.usda.gov; Tel.: +1-662-915-1035; Fax: +1-662-915-1035.

Received: 22 October 2012; in revised form: 22 October 2012 / Accepted: 22 October 2012 /

Published: 23 October 2012

The authors are sorry to report that the structure of rhizobitoxine in Figure 2 in their published paper [1] was incorrect. The correct figure should be:

**Figure 2.** Structure of rhizobitoxine.

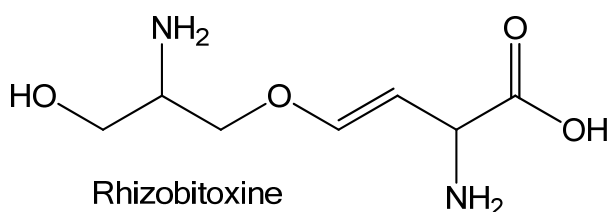

We apologize for any inconvenience caused to the readers.

**References**

1. Duke, S.O.; Dayan, F.E. Modes of Action of Microbially-Produced Phytotoxins. *Toxins* **2011**, *3*, 1038–1064.
